# Supplementary material for: Intravenous iron isomaltoside 1000 administered by high single-dose infusions or standard medical care for the treatment of fatigue in women after postpartum haemorrhage: study protocol for a randomised controlled trial
Source: PubMed Central journal article supplement (PMC4326197; doi:10.1186/1745-6215-16-5), 2015-01-14
Supplement: 13063_2014_2392_MOESM1_ESM.pdf [file 13063_2014_2392_MOESM1_ESM.pdf]

## POSTPARTUM QUESTIONNAIRE

1. Hvor træt er du nu? Angiv med en lodret streg på nedenstående linje hvor træt du føler dig.

Ikke træt | \_\_\_\_\_ | Meget træt

2. Hvad oplever du mest besværende, smerter eller træthed?

Kun smerter – Mest smerter – Ligeligt – Mest træthed – Kun træthed

3. Hvordan mærker du trætheden mest – fysisk eller psykisk?

Kun fysisk – Mest fysisk – Ligeligt – Mest psykisk – Kun psykisk

4. Føler du trætheden influerer på din amning?

Meget – Noget – Lidt - Slet ikke

5. Føler du trætheden influerer på din kontakt til dit barn?

Meget – Noget – Lidt - Slet ikke

6. Er du så træt at du må bede andre om at hjælpe med bleskift?

Hver gang – Ofte - Af og til – Aldrig

Mange tak for din medvirken
